# Supplementary material for: Thermophilic Inorganic Pyrophosphatase Ton1914 from Thermococcus onnurineus NA1 Removes the Inhibitory Effect of Pyrophosphate
Source: MDPI journal article supplement (doi:10.3390/ijms232112735), 2022-10-22
Supplement: s1 [file s1]

## Supplementary Materials

# Thermophilic Inorganic Pyrophosphatase Ton1914 from *Thermococcus onnurineus* NA1 Removes the Inhibitory Effect of Pyrophosphate

Yajing Li, Xue Yang and Renjun Gao \*

Key Laboratory for Molecular Enzymology and Engineering of Ministry of Education, School of Life Science, Jilin University, Changchun 130021, China

\* Correspondence: gaorj@jlu.edu.cn; Tel.: +86-186-0431-3058

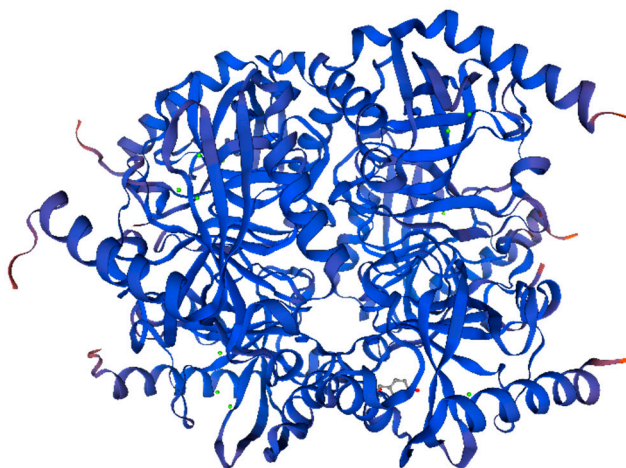

**Figure S1.** Structural information of Ton1914 modeled by Discovery Studio. The template selected is Tt-IPPase from *Thermococcus thioautotrophicus* and sequence identity is 96.07 %.

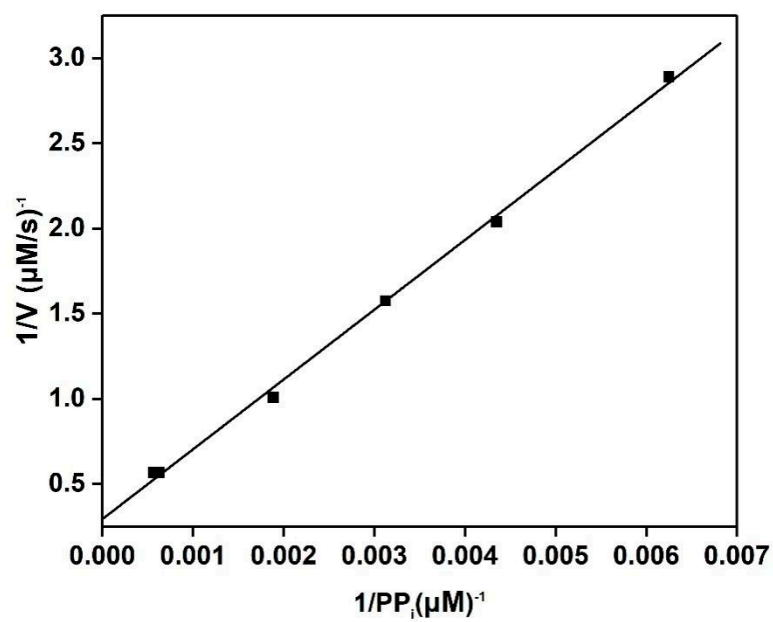

**Figure S2.** The kinetic curves of Ton1914. The experiments were conducted at 80°C with Tris-HCl buffer (pH 9.0) for 9000 s.

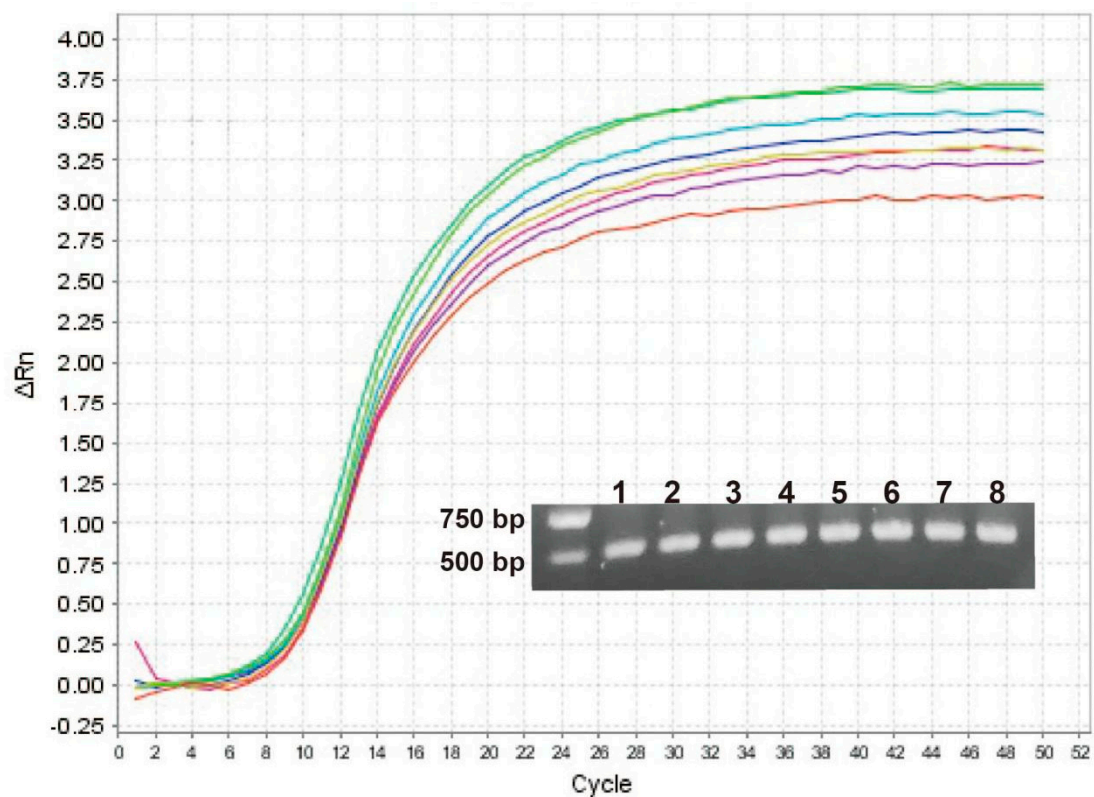

**Figure S3.** Optimal addition of Ton1914 in RT-PCR reactions a. The concentrations of Ton1914 added to each line in the graph from top to bottom were 0.0007 mg/mL, 0.0005

mg/mL, 0.0009 mg/mL, 0.0011 mg/mL, 0.0003 mg/mL, 0.0013 mg/mL, 0.0015 mg/mL and 0 mg/mL, respectively; 1-8 in inset b are 0 mg/mL, 0.0003 mg/mL, 0.0005 mg/mL, 0.0007 mg/mL, 0.0009 mg/mL, and 0.0011 mg/mL, 0.0013 mg/mL and 0.0015 mg/mL respectively. Perform qPCR with Tfu2902 template.

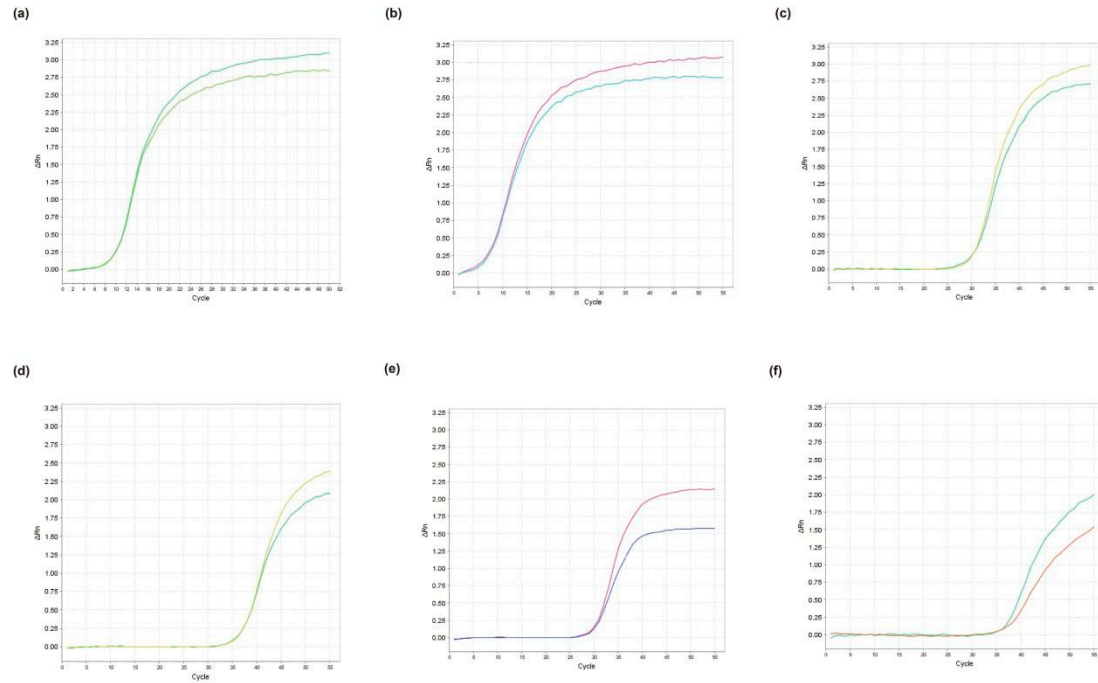

**Figure S4.** qPCR promotion effect of Ton1914 on DNA of different sizes. a, Tfu2902; b, Gs01315; c, Aaci0783; d, Tl08779; e, Cus2552; and f, pET28a-*Tn0602*. The upper curve is adding Ton1914 group, the lower curve is not adding Ton1914 group.
